# Supplementary material
Source: PubMed Central journal article supplement (PMC6874750)
Supplement: NIHMS1537653-supplement-1.pdf [file NIHMS1537653-supplement-1.pdf]

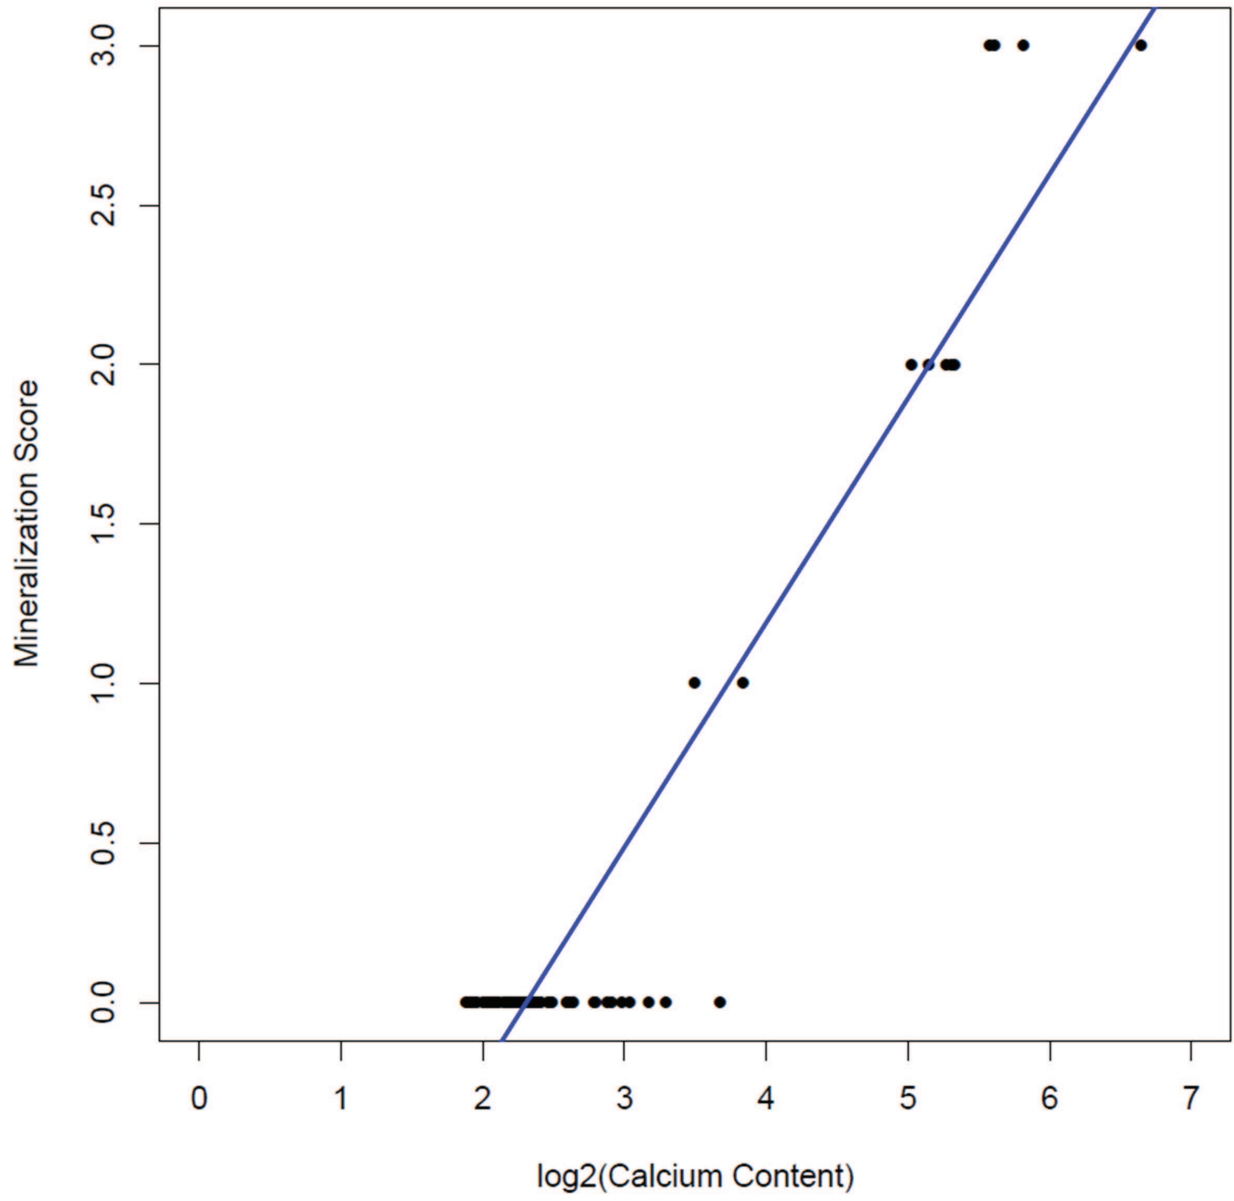

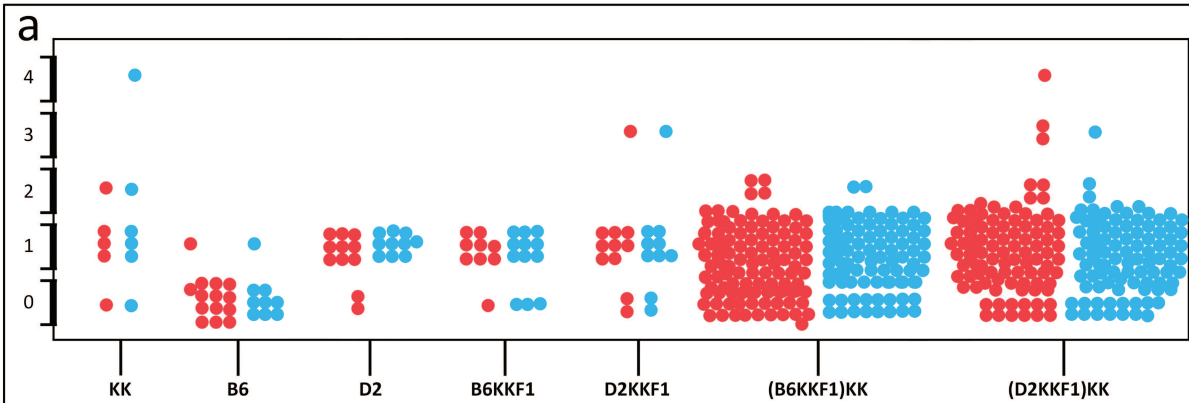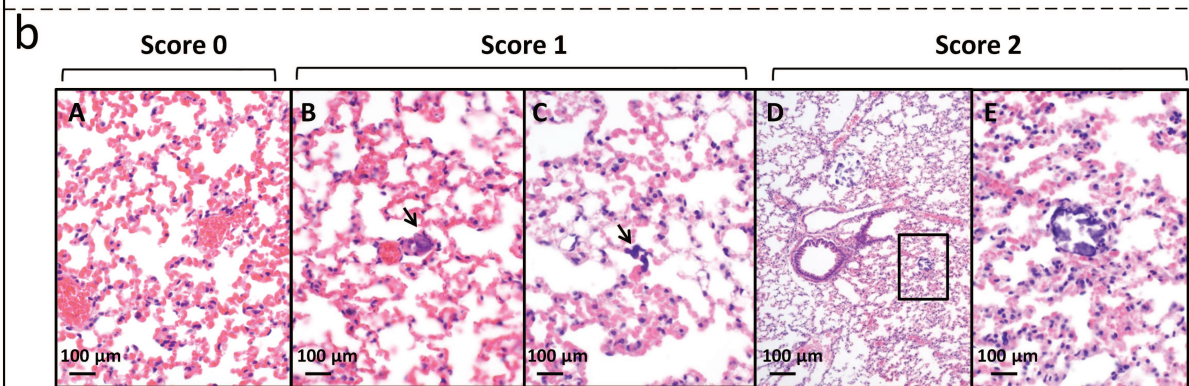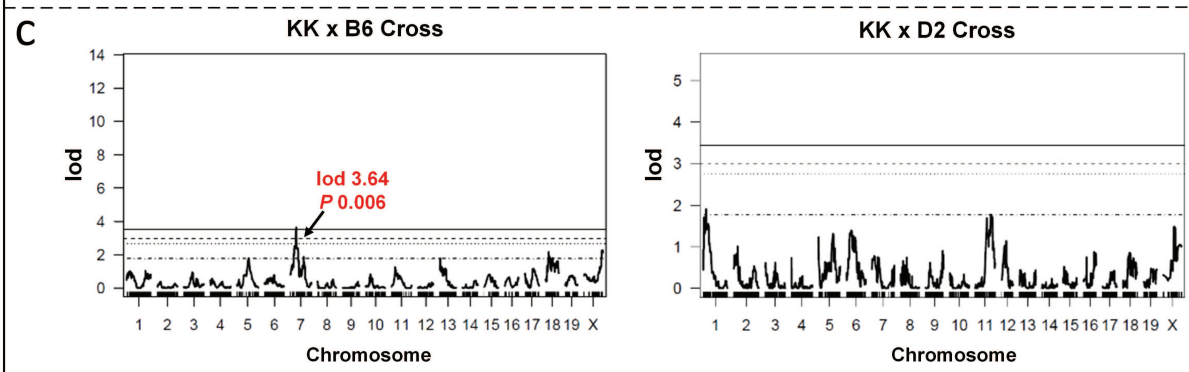

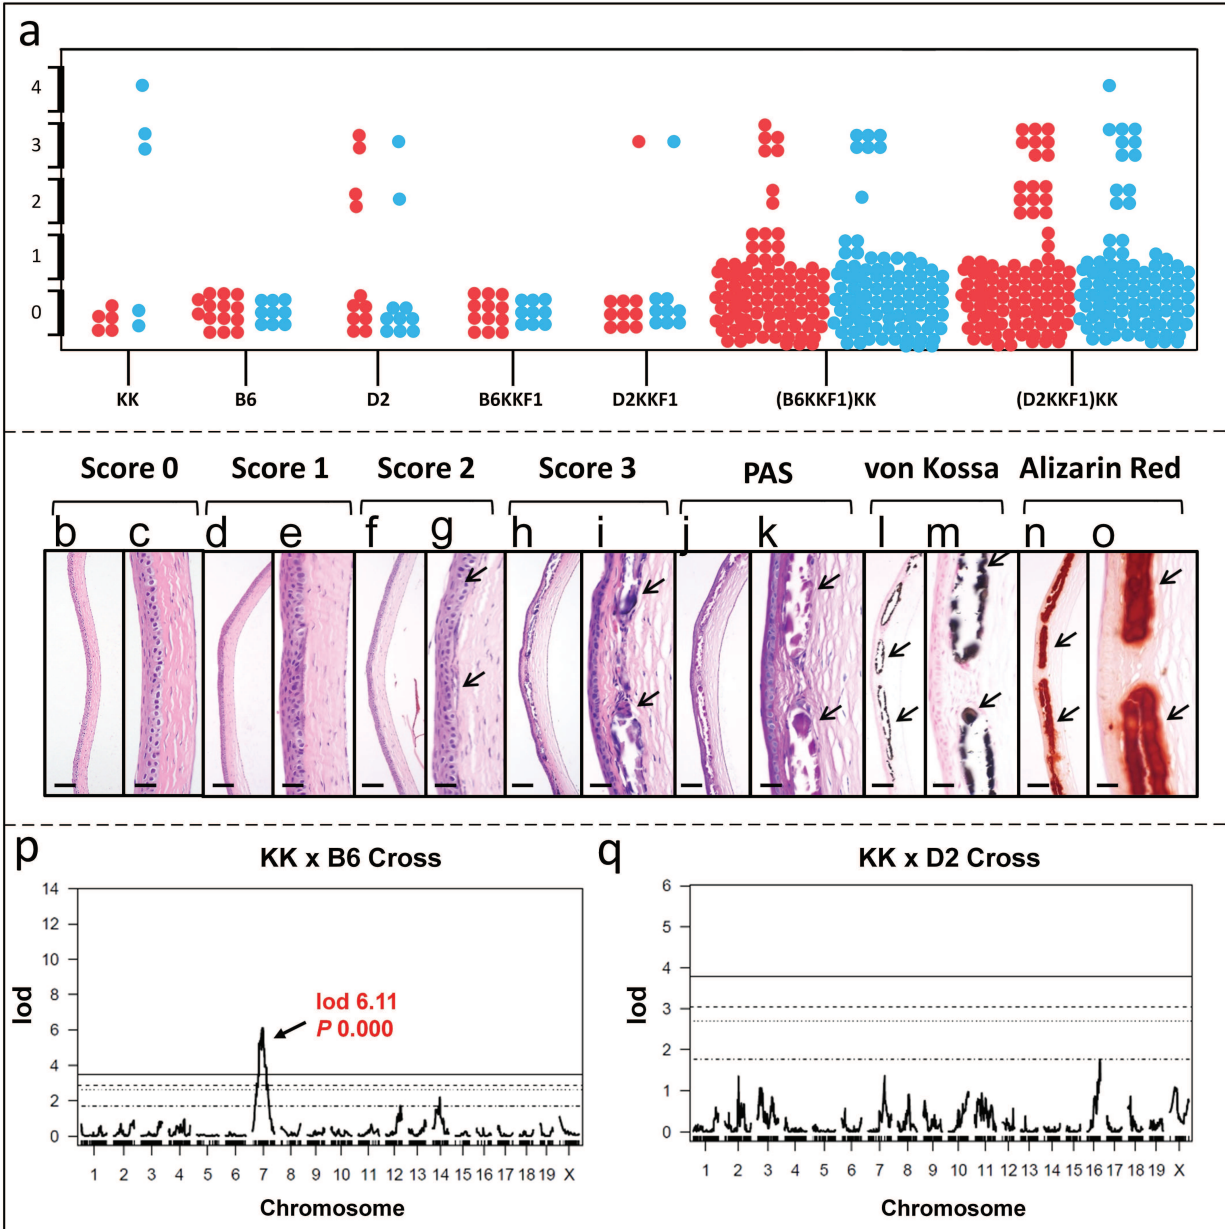

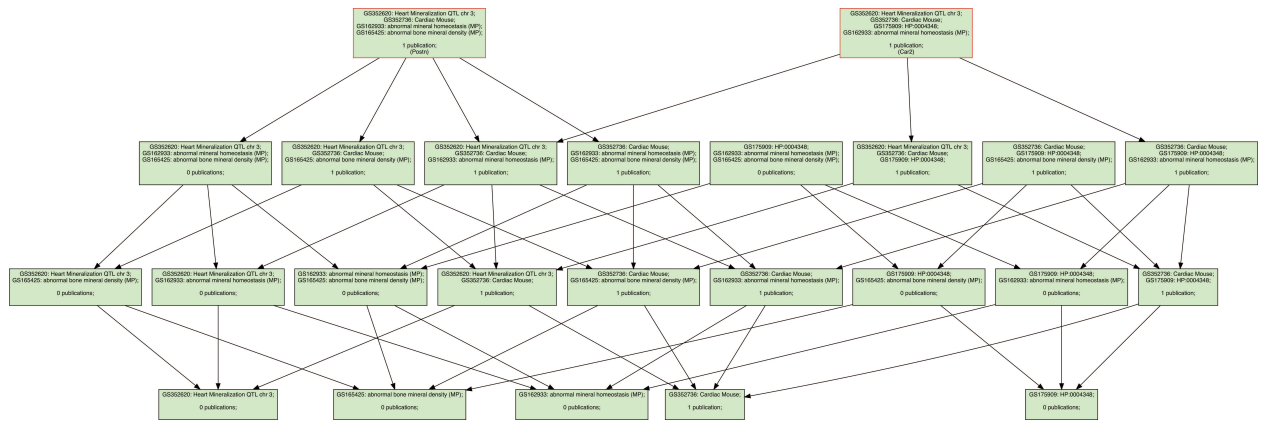



**Table S1. A list of 22 genes, which when mutated in humans and/or mice, result in ectopic mineralization phenotypes.** Some of these arose or were made in mouse inbred (congenic) strain backgrounds prone to these conditions, such as C3 or 129 substrains, which carry a hypomorphic allele of *Abcc6* and therefore had lesions that could interfere with interpretation of the phenotype for the gene in question (Berndt *et al.*, 2013; Li *et al.*, 2014b).

| Gene Symbol   | Gene Name                                                                          | Human Disease <sup>‡</sup> | Sites of Ectopic Mineralization       |                                                                           |                                                                                                                                                |
|---------------|------------------------------------------------------------------------------------|----------------------------|---------------------------------------|---------------------------------------------------------------------------|------------------------------------------------------------------------------------------------------------------------------------------------|
|               |                                                                                    |                            | Human                                 | Mouse                                                                     | Ref                                                                                                                                            |
| <i>Abcc6</i>  | ATP-binding cassette, family C, member 6                                           | PXE                        | skin, eye, kidney, heart, aorta       | skin, muzzle skin, eye, kidney, heart, aorta                              | (Klement <i>et al.</i> , 2005; Uitto <i>et al.</i> , 2017)                                                                                     |
| <i>Adipoq</i> | Adiponectin, C1Q and collagen domain containing                                    | UNK                        | UNK                                   | aorta                                                                     | (Ma <i>et al.</i> , 2002; Streeper <i>et al.</i> , 2006)                                                                                       |
| <i>Ahsg</i>   | Alpha-2-HS-glycoprotein                                                            | UNK                        | UNK                                   | skin, heart, kidney, muscle, lung, tongue                                 | (Jahnen-Dechent <i>et al.</i> , 1997),(Merx <i>et al.</i> , 2005),(Schafer <i>et al.</i> , 2003)                                               |
| <i>Ank</i>    | Progressive ankylosis                                                              | CMDD                       | cartilage                             | cartilage                                                                 | (Pendleton <i>et al.</i> , 2002),(Sweet and Green, 1981),(Villa-Bellosta <i>et al.</i> , 2011),(Ho <i>et al.</i> , 2000)                       |
| <i>ApoE</i>   | Apolipoprotein E                                                                   | Atherosclerosis            | aorta                                 | aorta                                                                     | (Sullivan <i>et al.</i> , 1998),(Matsushima <i>et al.</i> , 1999)                                                                              |
| <i>Atf4</i>   | Activating transcription factor 4                                                  | Atherosclerosis            | aorta                                 | UNK                                                                       | (Masuda <i>et al.</i> , 2016)                                                                                                                  |
| <i>Car2</i>   | Carbonic anhydrase II                                                              | CA II deficiency syndrome  | brain                                 | arteries in multiple organs                                               | (Sly <i>et al.</i> , 1983),(Spicer <i>et al.</i> , 1989)                                                                                       |
| <i>Casr</i>   | Calcium-sensing receptor                                                           | HHC1                       | no lesions                            | muzzle skin, heart, aorta, kidney, muscle, tongue, testis, ovary, colon   | (Hough <i>et al.</i> , 2004)                                                                                                                   |
| <i>Enpp1</i>  | Ectonucleotide pyrophosphatase/phosphodiesterase 1                                 | GAC1                       | arteries                              | skin, muzzle skin, eye, kidney, heart, aorta, cartilage, ligament, tendon | (Uitto <i>et al.</i> , 2017),(Li <i>et al.</i> , 2014a),(Li <i>et al.</i> , 2013)                                                              |
| <i>Fam20a</i> | Family with sequence similarity 20, member A                                       | UNK                        | UNK                                   | eye, kidney, heart, lung, muscle, testis                                  | (Vogel <i>et al.</i> , 2012)                                                                                                                   |
| <i>Fgf23</i>  | Fibroblast growth factor 23                                                        | HFTC                       | skin                                  | heart, kidney                                                             | (Chafetz <i>et al.</i> , 2005),(Shimada <i>et al.</i> , 2004)                                                                                  |
| <i>Galnt3</i> | UDP-N-acetyl-alpha-D-galactosamine:polypeptide N-acetylgalactosaminyltransferase 3 | HFTC                       | skin                                  | no lesions                                                                | (Topaz <i>et al.</i> , 2006; Ichikawa <i>et al.</i> , 2007)                                                                                    |
| <i>Ggcx</i>   | Gamma-glutamyl carboxylase                                                         | PXE/VKCFD1                 | skin                                  | no lesions                                                                | (Li <i>et al.</i> , 2009),(Vanakker <i>et al.</i> , 2007),(Shiba <i>et al.</i> , 2014),(Azuma <i>et al.</i> , 2014),(Zhu <i>et al.</i> , 2007) |
| <i>K1</i>     | Klotho                                                                             | HFTC                       | skin                                  | skin, aorta, kidney, heart, lung, testis                                  | (Kuro-o <i>et al.</i> , 1997),(Ichikawa <i>et al.</i> , 2007),(Hu <i>et al.</i> , 2011)                                                        |
| <i>Mgp</i>    | Matrix Gla protein                                                                 | KTLS                       | aorta                                 | aorta, cartilage                                                          | (Munroe <i>et al.</i> , 1999),(Luo <i>et al.</i> , 1997)                                                                                       |
| <i>Nt5e</i>   | 5' nucleotidase, ecto                                                              | ACDC                       | arteries, cartilage, ligament, tendon | cartilage, ligament, tendon                                               | (Eltzschig and Robson, 2011),(Li <i>et al.</i> , 2014b)                                                                                        |

|                  |                                                              |                 |       |                                                            |                                                                                              |
|------------------|--------------------------------------------------------------|-----------------|-------|------------------------------------------------------------|----------------------------------------------------------------------------------------------|
| <i>Samd9</i>     | Sterile alpha motif domain containing 9                      | NFTC            | skin  | no mouse equivalent                                        | (Chefetz <i>et al.</i> , 2008),(Topaz <i>et al.</i> , 2006),(Sprecher, 2010)                 |
| <i>Slc20a2</i>   | Solute carrier family 20, member 2                           | IBGC1           | brain | brain                                                      | (Jensen <i>et al.</i> , 2013), (Jensen <i>et al.</i> , 2016)                                 |
| <i>Slc29a1</i>   | Solute carrier family 29 (nucleotide transporters), member 1 | UNK             | UNK   | spinal tissues                                             | (Warraich <i>et al.</i> , 2013)                                                              |
| <i>Spp1</i>      | Secreted phosphoprotein 1                                    | Atherosclerosis | aorta | aorta                                                      | (Shao <i>et al.</i> , 2011)                                                                  |
| <i>Tnfrsf11b</i> | Tumor necrosis factor receptor superfamily, member 11b       | HTC1            | UNK   | aorta                                                      | (Fantauzzo <i>et al.</i> , 2008),(Callegari <i>et al.</i> , 2013),(Yun <i>et al.</i> , 2001) |
| <i>Trim24</i>    | Tripartite motif-containing 24                               | UNK             | UNK   | skin, muzzle skin, eye, heart, aorta, kidney, lung, tongue | (Ignat <i>et al.</i> , 2008)                                                                 |

‡ PXE, pseudoxanthoma elasticum; HOPS, hypophosphatasia, childhood and hypophosphatasia, infantile; CMDD, craniometaphyseal dysplasia, autosomal dominant; HHC1, hypocalciuric hypercalcemia, familial, type 1; GACI, generalized arterial calcification of infancy; HFTC, hyperphosphatemic familial tumoral calcinosis; PXE/VKCFD1, PXE-like disorder with multiple coagulation factor deficiency; KTLS, Keutel syndrome; ACDC, arterial calcification due to CD73 deficiency; NFTC, normophosphatemic tumoral calcinosis; IBGC1, idiopathic basal ganglia calcification 1; DISH, diffuse idiopathic skeletal hyperostosis; HTC1, hypertrichosis universalis congenita, Ambras type. UNK, unknown.

**Table S2. Numbers of mice evaluated by sex and strain/cross for phenotype and/or genotyping**

| Strain/Cross* | Phenotyping Tissues |       |       | DNA Collected for GigaMuga Arrays |       |       |
|---------------|---------------------|-------|-------|-----------------------------------|-------|-------|
|               | Females             | Males | Total | Females                           | Males | Total |
| C57BL/6J      | 14                  | 9     | 23    | 1                                 | 1     | 2     |
| DBA/2J        | 11                  | 10    | 21    | 1                                 | 1     | 2     |
| KK/HIJ        | 5                   | 5     | 10    | 1                                 | 1     | 2     |
| B6KKF1        | 12                  | 9     | 21    | 1                                 | 1     | 2     |
| D2KKF1        | 10                  | 9     | 19    | 1                                 | 1     | 1     |
| (B6KKF1)KK    | 91                  | 92    | 183   | 91                                | 92    | 183   |
| (D2KKF1)KK    | 97                  | 94    | 191   | 97                                | 94    | 191   |

\*strain/cross designations assigned by the International Mouse Genetic Nomenclature Committee

(<http://www.informatics.jax.org/mgihome/nomen/strains.shtml>)



## SUPPLEMENTARY REFERENCE LIST

- Azuma K, Tsukui T, Ikeda K, Shiba S, Nakagawa K, Okano T, *et al.* Liver-specific gamma-glutamyl carboxylase-deficient mice display bleeding diathesis and short life span. *PLoS One* 2014;9:e88643.
- Berndt A, Li Q, Potter CS, Liang Y, Silva KA, Kennedy V, *et al.* A single-nucleotide polymorphism in the *Abcc6* gene associates with connective tissue mineralization in mice similar to targeted models for pseudoxanthoma elasticum. *J Invest Dermatol* 2013;133:833-6.
- Callegari A, Coons ML, Ricks JL, Yang HL, Gross TS, Huber P, *et al.* Bone marrow- or vessel wall-derived osteoprotegerin is sufficient to reduce atherosclerotic lesion size and vascular calcification. *Arterioscler Thromb Vasc Biol* 2013;33:2491-500.
- Chefetz I, Heller R, Galli-Tsinopoulou A, Richard G, Wollnik B, Indelman M, *et al.* A novel homozygous missense mutation in *FGF23* causes Familial Tumoral Calcinosis associated with disseminated visceral calcification. *Hum Genet* 2005;118:261-6.
- Chefetz I, Ben Amitai D, Browning S, Skorecki K, Adir N, Thomas MG, *et al.* Normophosphatemic familial tumoral calcinosis is caused by deleterious mutations in *SAMD9*, encoding a TNF-alpha responsive protein. *J Invest Dermatol* 2008;128:1423-9.
- Eltzschig HK, Robson SC. NT5E mutations and arterial calcifications. *N Engl J Med* 2011;364:1577-8; author reply 9-80.
- Fantauzzo KA, Tadin-Strapps M, You Y, Mentzer SE, Baumeister FA, Cianfarani S, *et al.* A position effect on *TRPS1* is associated with Ambras syndrome in humans and the Koala phenotype in mice. *Hum Mol Genet* 2008;17:3539-51.
- Ho AM, Johnson MD, Kingsley DM. Role of the mouse *ank* gene in control of tissue calcification and arthritis. *Science* 2000;289:265-70.
- Hough TA, Bogani D, Cheeseman MT, Favor J, Nesbit MA, Thakker RV, *et al.* Activating calcium-sensing receptor mutation in the mouse is associated with cataracts and ectopic calcification. *Proc Natl Acad Sci U S A* 2004;101:13566-71.
- Hu MC, Shi M, Zhang J, Quinones H, Griffith C, Kuro-o M, *et al.* *Klotho* deficiency causes vascular calcification in chronic kidney disease. *J Am Soc Nephrol* 2011;22:124-36.

- Ichikawa S, Imel EA, Kreiter ML, Yu X, Mackenzie DS, Sorenson AH, *et al.* A homozygous missense mutation in human KLOTHO causes severe tumoral calcinosis. *J Clin Invest* 2007;117:2684-91.
- Ignat M, Teletin M, Tisserand J, Khetchoumian K, Dennefeld C, Chambon P, *et al.* Arterial calcifications and increased expression of vitamin D receptor targets in mice lacking TIF1alpha. *Proc Natl Acad Sci U S A* 2008;105:2598-603.
- Jahnen-Dechent W, Schinke T, Trindl A, Muller-Esterl W, Sablitzky F, Kaiser S, *et al.* Cloning and targeted deletion of the mouse fetuin gene. *J Biol Chem* 1997;272:31496-503.
- Jensen N, Schroder HD, Hejbol EK, Fuchtbauer EM, de Oliveira JR, Pedersen L. Loss of function of Slc20a2 associated with familial idiopathic Basal Ganglia calcification in humans causes brain calcifications in mice. *J Mol Neurosci* 2013;51:994-9.
- Jensen N, Autzen JK, Pedersen L. Slc20a2 is critical for maintaining a physiologic inorganic phosphate level in cerebrospinal fluid. *Neurogenetics* 2016;17:125-30.
- Klement JF, Matsuzaki Y, Jiang QJ, Terlizzi J, Choi HY, Fujimoto N, *et al.* Targeted ablation of the *Abcc6* gene results in ectopic mineralization of connective tissues. *Mol Cell Biol* 2005;25:8299-310.
- Kuro-o M, Matsumura Y, Aizawa H, Kawaguchi H, Suga T, Utsugi T, *et al.* Mutation of the mouse klotho gene leads to a syndrome resembling ageing. *Nature* 1997;390:45-51.
- Li Q, Grange DK, Armstrong NL, Whelan AJ, Hurley MY, Rishavy MA, *et al.* Mutations in the *GGCX* and *ABCC6* genes in a family with pseudoxanthoma elasticum-like phenotypes. *J Invest Dermatol* 2009;129:553-63.
- Li Q, Guo H, Chou DW, Berndt A, Sundberg JP, Uitto J. Mutant *Enpp1<sup>asj</sup>* mouse as a model for generalized arterial calcification of infancy. *Dis Model Mech* 2013;6:1227-35.
- Li Q, Pratt CH, Dionne LA, Fairfield H, Karst SY, Sundberg JP, *et al.* Spontaneous *asj-2J* mutant mouse as a model for generalized arterial calcification of infancy: A large deletion/insertion mutation in the *Enpp1* gene. *PLOS One* 2014a;9:e113542.

- Li Q, Price TP, Sundberg JP, Uitto J. Juxta-articular joint-capsule mineralization in CD73 deficient mice: Similarities to patients with *NT5E* mutations. *Cell Cycle* 2014b;13:2609-15.
- Luo G, Ducy P, McKee MD, Pinero GJ, Loyer E, Behringer RR, *et al.* Spontaneous calcification of arteries and cartilage in mice lacking matrix GLA protein. *Nature* 1997;386:78-81.
- Ma K, Cabrero A, Saha PK, Kojima H, Li L, Chang BH, *et al.* Increased beta -oxidation but no insulin resistance or glucose intolerance in mice lacking adiponectin. *J Biol Chem* 2002;277:34658-61.
- Masuda M, Miyazaki-Anzai S, Keenan AL, Shiozaki Y, Okamura K, Chick WS, *et al.* Activating transcription factor-4 promotes mineralization in vascular smooth muscle cells. *JCI Insight* 2016;1:e88646.
- Matsushima Y, Hayashi S, Tachibana M. Spontaneously hyperlipidemic (SHL) mice: Japanese wild mice with apolipoprotein E deficiency. *Mamm Genome* 1999;10:352-7.
- Merx MW, Schafer C, Westenfeld R, Brandenburg V, Hidajat S, Weber C, *et al.* Myocardial stiffness, cardiac remodeling, and diastolic dysfunction in calcification-prone fetuin-A-deficient mice. *J Am Soc Nephrol* 2005;16:3357-64.
- Munroe PB, Olgunturk RO, Fryns JP, Van Maldergem L, Ziereisen F, Yuksel B, *et al.* Mutations in the gene encoding the human matrix Gla protein cause Keutel syndrome. *Nat Genet* 1999;21:142-4.
- Pendleton A, Johnson MD, Hughes A, Gurley KA, Ho AM, Doherty M, *et al.* Mutations in ANKH cause chondrocalcinosis. *Am J Hum Genet* 2002;71:933-40.
- Schafer C, Heiss A, Schwarz A, Westenfeld R, Ketteler M, Floege J, *et al.* The serum protein alpha 2-Heremans-Schmid glycoprotein/fetuin-A is a systemically acting inhibitor of ectopic calcification. *J Clin Invest* 2003;112:357-66.
- Shao JS, Sierra OL, Cohen R, Mecham RP, Kovacs A, Wang J, *et al.* Vascular calcification and aortic fibrosis: a bifunctional role for osteopontin in diabetic arteriosclerosis. *Arterioscler Thromb Vasc Biol* 2011;31:1821-33.

Shiba S, Ikeda K, Azuma K, Hasegawa T, Amizuka N, Horie-Inoue K, *et al.* gamma-Glutamyl carboxylase in osteoblasts regulates glucose metabolism in mice. *Biochem Biophys Res Commun* 2014;453:350-5.

Shimada T, Kakitani M, Yamazaki Y, Hasegawa H, Takeuchi Y, Fujita T, *et al.* Targeted ablation of Fgf23 demonstrates an essential physiological role of FGF23 in phosphate and vitamin D metabolism. *J Clin Invest* 2004;113:561-8.

Sly WS, Hewett-Emmett D, Whyte MP, Yu YS, Tashian RE. Carbonic anhydrase II deficiency identified as the primary defect in the autosomal recessive syndrome of osteopetrosis with renal tubular acidosis and cerebral calcification. *Proc Natl Acad Sci U S A* 1983;80:2752-6.

Spicer SS, Lewis SE, Tashian RE, Schulte BA. Mice carrying a CAR-2 null allele lack carbonic anhydrase II immunohistochemically and show vascular calcification. *Am J Pathol* 1989;134:947-54.

Sprecher E. Familial tumoral calcinosis: from characterization of a rare phenotype to the pathogenesis of ectopic calcification. *J Invest Dermatol* 2010;130:652-60.

Streeper RS, Koliwad SK, Villanueva CJ, Farese RV, Jr. Effects of DGAT1 deficiency on energy and glucose metabolism are independent of adiponectin. *Am J Physiol Endocrinol Metab* 2006;291:E388-94.

Sullivan PM, Mezdour H, Quarfordt SH, Maeda N. Type III hyperlipoproteinemia and spontaneous atherosclerosis in mice resulting from gene replacement of mouse Apoe with human Apoe\*2. *J Clin Invest* 1998;102:130-5.

Sweet HO, Green MC. Progressive ankylosis, a new skeletal mutation in the mouse. *J Hered* 1981;72:87-93.

Topaz O, Indelman M, Chefetz I, Geiger D, Metzker A, Altschuler Y, *et al.* A deleterious mutation in SAMD9 causes normophosphatemic familial tumoral calcinosis. *Am J Hum Genet* 2006;79:759-64.

Uitto J, Li Q, van de Wetering K, Varadi A, Terry SF. Insights into pathomechanisms and treatment development in heritable ectopic mineralization disorders: Summary of the PXE International Biennial Research Symposium-2016. *J Invest Dermatol* 2017;137:790-5.

Vanakker OM, Martin L, Gheduzzi D, Leroy BP, Loeys BL, Guerci VI, *et al.* Pseudoxanthoma elasticum-like phenotype with cutis laxa and multiple coagulation factor deficiency represents a separate genetic entity. *J Invest Dermatol* 2007;127:581-7.

Villa-Bellosta R, Wang X, Millan JL, Dubyak GR, O'Neill WC. Extracellular pyrophosphate metabolism and calcification in vascular smooth muscle. *Am J Physiol Heart Circ Physiol* 2011;301:H61-8.

Vogel P, Hansen GM, Read RW, Vance RB, Thiel M, Liu J, *et al.* Amelogenesis imperfecta and other biomineralization defects in Fam20a and Fam20c null mice. *Vet Pathol* 2012;49:998-1017.

Warrach S, Bone DB, Quinonez D, Ii H, Choi DS, Holdsworth DW, *et al.* Loss of equilibrative nucleoside transporter 1 in mice leads to progressive ectopic mineralization of spinal tissues resembling diffuse idiopathic skeletal hyperostosis in humans. *J Bone Miner Res* 2013;28:1135-49.

Yun TJ, Tallquist MD, Aicher A, Rafferty KL, Marshall AJ, Moon JJ, *et al.* Osteoprotegerin, a crucial regulator of bone metabolism, also regulates B cell development and function. *J Immunol* 2001;166:1482-91.

Zhu A, Sun H, Raymond RM, Jr., Furie BC, Furie B, Bronstein M, *et al.* Fatal hemorrhage in mice lacking gamma-glutamyl carboxylase. *Blood* 2007;109:5270-5.

## SUPPLEMENTARY FIGURE LEGEND

### **Figure S1. Linear regression analysis of the correlation between the calcium content and the mineralization score in the parental strains and the F1 hybrid mice.**

For the number of mice analyzed, see Table S2.

### **Figure S2. Histopathology of lung mineralization and QTL plots.**

(a), Phenotypic scores of the parental strains of mice, F1 and N2 progeny determined by histopathology. Each dot represents a mouse (red, females; blue, males). (b-F), Histopathologic evaluation of ectopic mineralization. Normal lungs were infrequent with mineralization (b, score 0). Most of mice had some minor form of mineralization in their lungs. These consisted of purple crystalline structures within alveoli (c, score 1, arrow), to amorphous purple structures within the alveolar wall (d, score 1, arrow). The few moderately affected mice had multiple crystalline purple structures that often fragmented as a sectioning artifact. These were larger than the occasional mild forms (e, score 2). f, enlarged boxed area in e. Ectopic mineralization is indicated by arrows. Scale bar – 100  $\mu\text{m}$ . (g-h), QTL plots from KK x B6 and KK x D2 crosses. KK and D2 both have the *Abcc6* mutant allele while B6 has the wild type allele. Therefore, in KK x B6 cross, a major QTL was identified on Chr. 7 that involves *Abcc6* ( $P < 0.05$ ); however, there is no linkage to *Abcc6* in KK x D2 cross.

### **Figure S3. Histopathology of eye mineralization and QTL plots.**

(a), Phenotypic scores of the parental strains of mice, F1 and N2 progeny determined by histopathology. Each dot represents a mouse (red, females; blue, males). (b-o), Histopathologic evaluation of ectopic mineralization. Corneal stroma mineralization developed to various degrees within the corneal stroma (b-i, score 0 to score 3). Early mild lesions appeared to involve the

Decemet's membrane but periodic acid Schiff (PAS) staining (basement membrane) demonstrated mineralization was in the stroma (j, k). Von Kossa (l, m) and Alizarin Red (n, o) confirm the crystalline material is mineralization. Ectopic mineralization is indicated by arrows. Scale bar = 100  $\mu\text{m}$  (panels b, d, f, h, j, l, and n). Scale bar = 10  $\mu\text{m}$  (panels c, e, g, I, k, m, and o). (p-q), QTL plots from KK x B6 and KK x D2 crosses. KK and D2 both have the *Abcc6* mutant allele while B6 has the wild type allele. Therefore, in KK x B6 cross, a major QTL was identified on Chr. 7 that involves *Abcc6* ( $P < 0.05$ ); however, there is no linkage to *Abcc6* in KK x D2 cross.

**Figure S4. Demonstration of *Car2* and *Postn* as candidate genes in Chr.3 QTL using GeneWeaver.**

A hierarchical similarity chart of ectopic mineralization-related gene sets. At the bottom of the chart are individual gene sets derived from QTL studies, existing cardiac transcriptome data, Sanger SNP database, and String database. Each successive level from the bottom to the top of the chart represents increasingly higher order intersections among these gene sets, with the most highly connected genes at the top.

**Figure S5. Demonstration of *Abcg3*, *Chek2*, *Aldh2*, *Ttc28*, *Hnf1a*, *Idua*, and *Dmp1* as candidate genes in Chr.5 QTL using GeneWeaver.**

A hierarchical similarity chart of ectopic mineralization-related gene sets. At the bottom of the chart are individual gene sets derived from QTL studies, existing kidney transcriptome data, Sanger SNP database, and String database. Each successive level from the bottom to the top of the chart represents increasingly higher order intersections among these gene sets, with the most highly connected genes at the top.
